# Supplementary material for: Quantifiable blood TCR repertoire components associate with immune aging
Source: PubMed Central journal article supplement — Nat Commun. 2024 Sep 17;15:8171. doi: 10.1038/s41467-024-52522-z (PMC11408526; doi:10.1038/s41467-024-52522-z), 2024-09-17
Supplement: 41467_2024_52522_MOESM1_ESM.pdf [file 41467_2024_52522_MOESM1_ESM.pdf]

# Quantifiable Blood TCR Repertoire Components Associate with Immune Aging

Jing Hu<sup>1,2</sup>, Mingyao Pan<sup>1</sup>, Brett Reid<sup>3</sup>, Shelley Tworoger<sup>3,4</sup>, Bo Li<sup>1,2\*</sup>

1: Department of Pathology and Laboratory Medicine, Perelman School of Medicine, University of Pennsylvania, PA

2: Department of Pathology and Laboratory Medicine, Children's Hospital of Philadelphia, PA

3: Department of Cancer Epidemiology, Moffitt Cancer Center, Tampa, FL

4: Knight Cancer Institute and Division of Oncological Sciences, Oregon Health and Science University, Portland, OR

\*: corresponding author: Bo Li (lib3@chop.edu)

## Supplementary Information Content:

Supplementary Fig. 1: Additional features of eRFUs.

Supplementary Fig. 2: eRFUs displayed mucosal-associated invariant T cell signatures.

Supplementary Fig. 3: Age association of stemness markers in the eRFU cells.

Supplementary Fig. 4: eRFU residual plot and distribution across different racial groups.

Supplementary Fig. 5: Additional results on eRFU functional impact.

Supplementary Fig. 6: eRFU dynamics with donor age or with post-transplantation days.

Supplementary Table 1: Data sets used in this study.

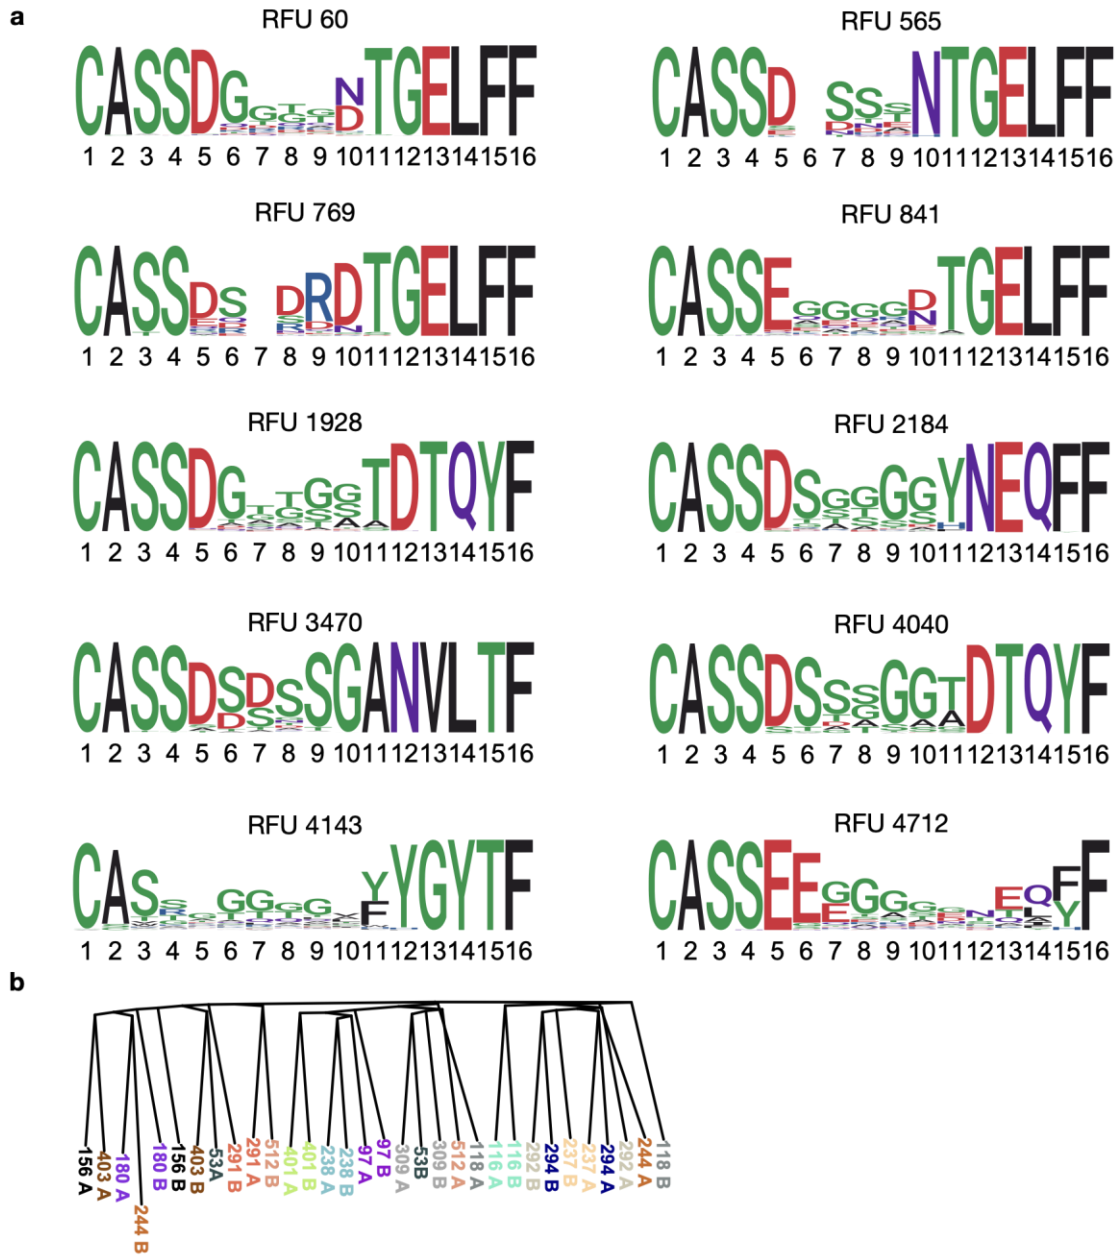

**Supplementary Fig. 1: Additional features of eRFUs.** a) Sequence logo plot for 10 eRFUs not shown in Figure 1. b) Neighbor joining tree showing the relationship between all the twins as in Figure 1h using all RFUs to calculate the distance matrix. Source data are provided as a Source Data file.

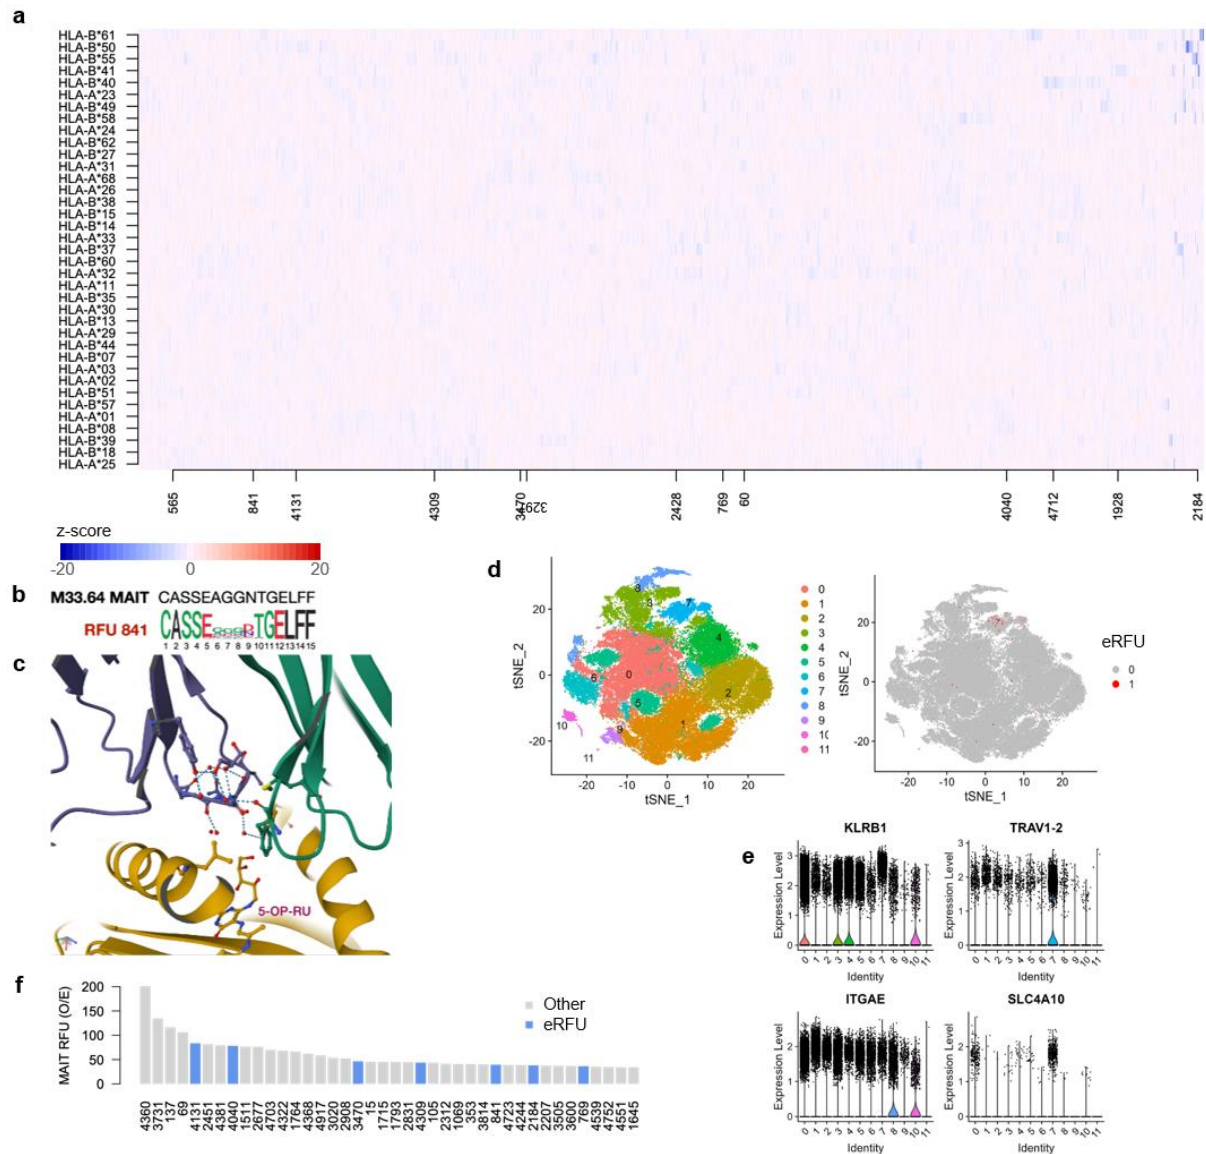

**Supplementary Fig. 2: eRFUs displayed mucosal-associated invariant T cell signatures.** **a)** Heatmap showing the z-scores of 5,000 RFUs and 37 HLA alleles. eRFU numbers are marked on x-axis. Details see Methods. **b)** Sequence motif comparison of the M33.64 TCR with RFU 841. **c)** Zoom-in view of the TCR $\beta$  chain (purple) of M33.64 interacting with MR1 (dijon yellow) and the antigen molecule (PDB accession: 5D7J). **d)** tSNE plot and clustering of T cells using single cell RNA-seq data (left) and same plot highlighting eRFU T cells with red color (right). **e)** Gene signature plot showing overexpression of selected MAIT cell markers in cluster 7. **f)** Enrichment analysis of MAIT RFUs among the T cells in the same single cell dataset. Source data are provided as a Source Data file.

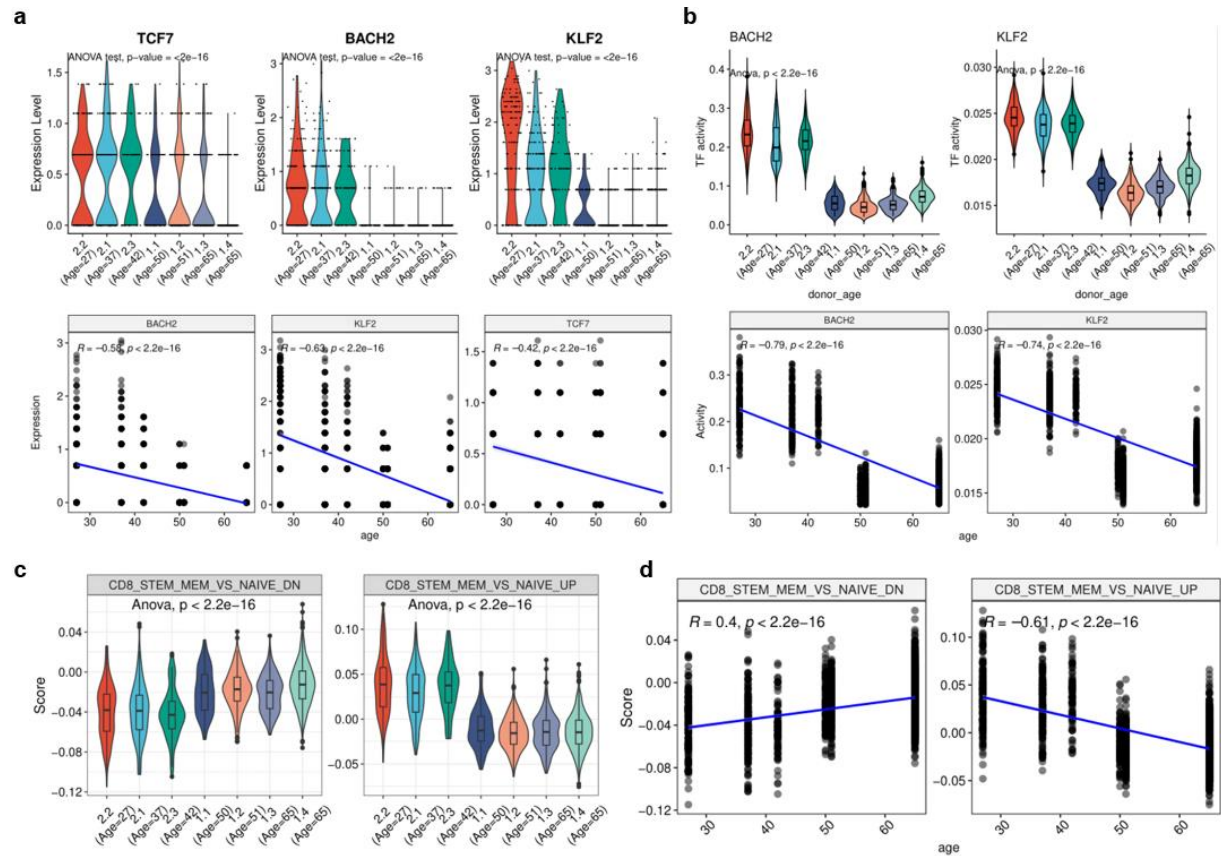

**Supplementary Fig. 3: Age association of stemness markers in the eRFU cells. a)** Violin (upper) or scatter (lower) plots showing the distributions of selected T cell stemness genes trending with age. Statistical significance in the upper panels was evaluated using one-way ANOVA, while the lower panels using Pearson's correlation test. **b)** Similar analysis as in A) performed for transcription factor activity for stemness markers BACH2 and KLF2. **c-d)** Similar analysis performed for the scores measuring the signature genes down- or up- regulated in CD8 stem memory T cells compared to naïve T cells. Source data are provided as a Source Data file.

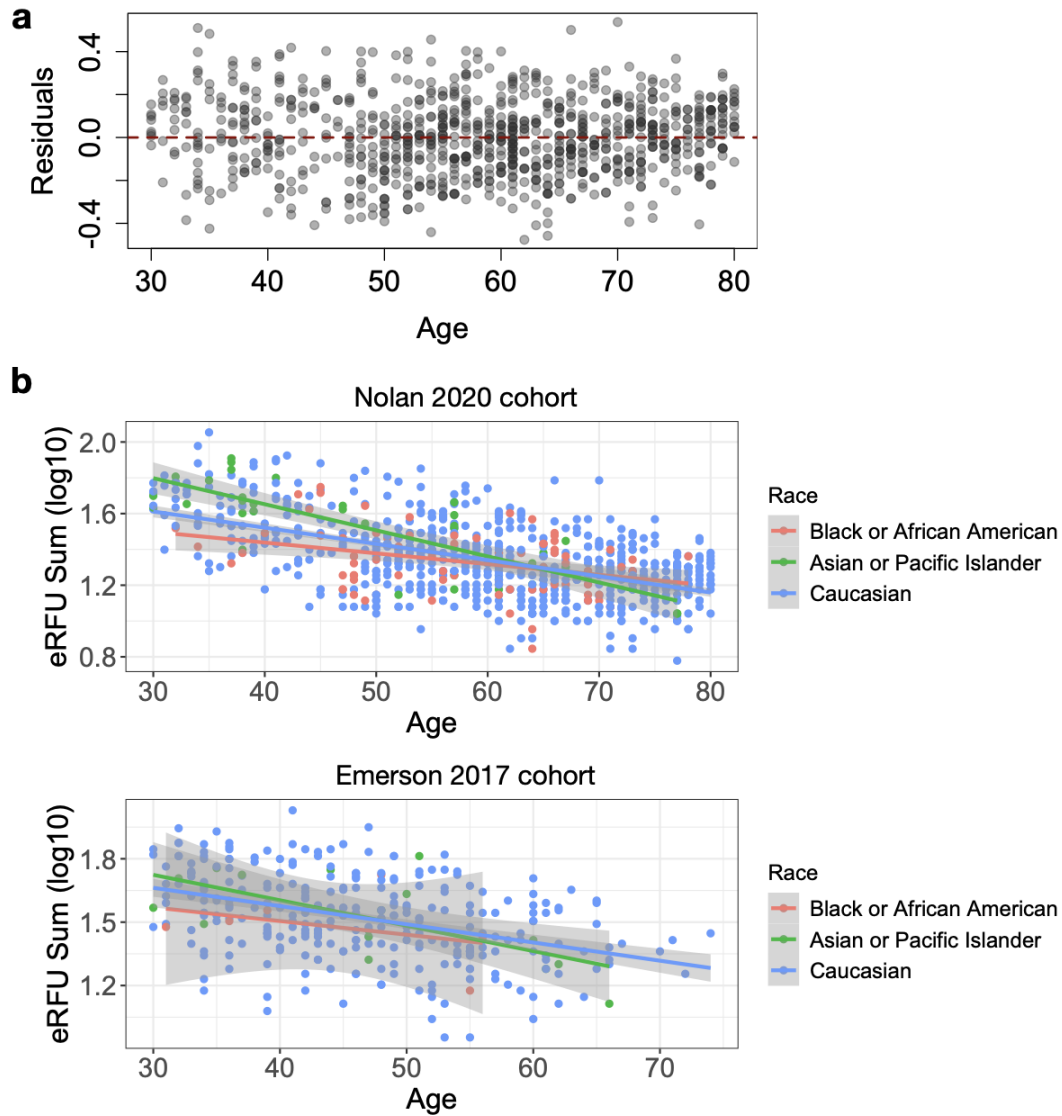

**Supplementary Fig. 4: eRFU residual plot and distribution across different racial groups.** **a)** Regression residual plot against age. Linear regression model  $\log_{10}(\text{eRFU sum}) \sim \text{Age}$  was estimated using Nolan 2020 cohort. **b)** Trends of eRFU sum with age stratified by racial groups. Source data are provided as a Source Data file.

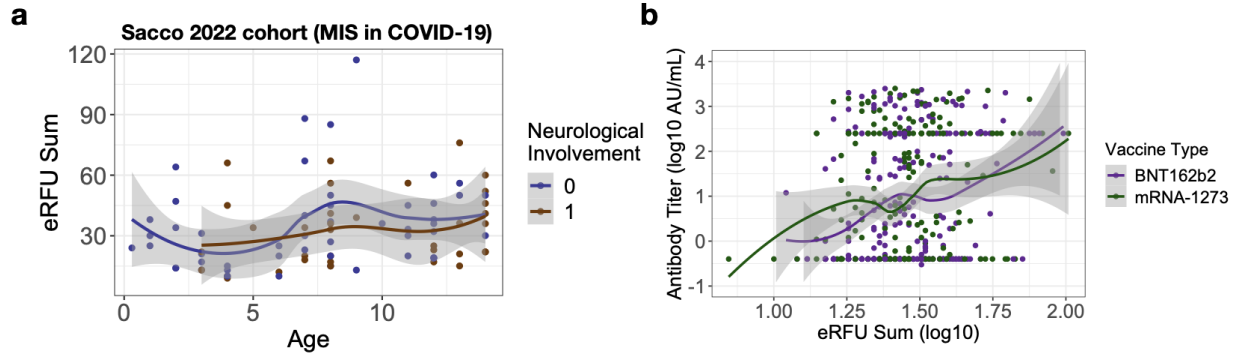

**Supplementary Fig. 5: Additional results on eRFU functional impact. a)** Scatter plot showing eRFU sum with age in pediatric COVID-19 cohort stratified with whether the patient developed neurological complications or not. **b)** Antibody titer increased with eRFU sum stratified by vaccine types. Source data are provided as a Source Data file.

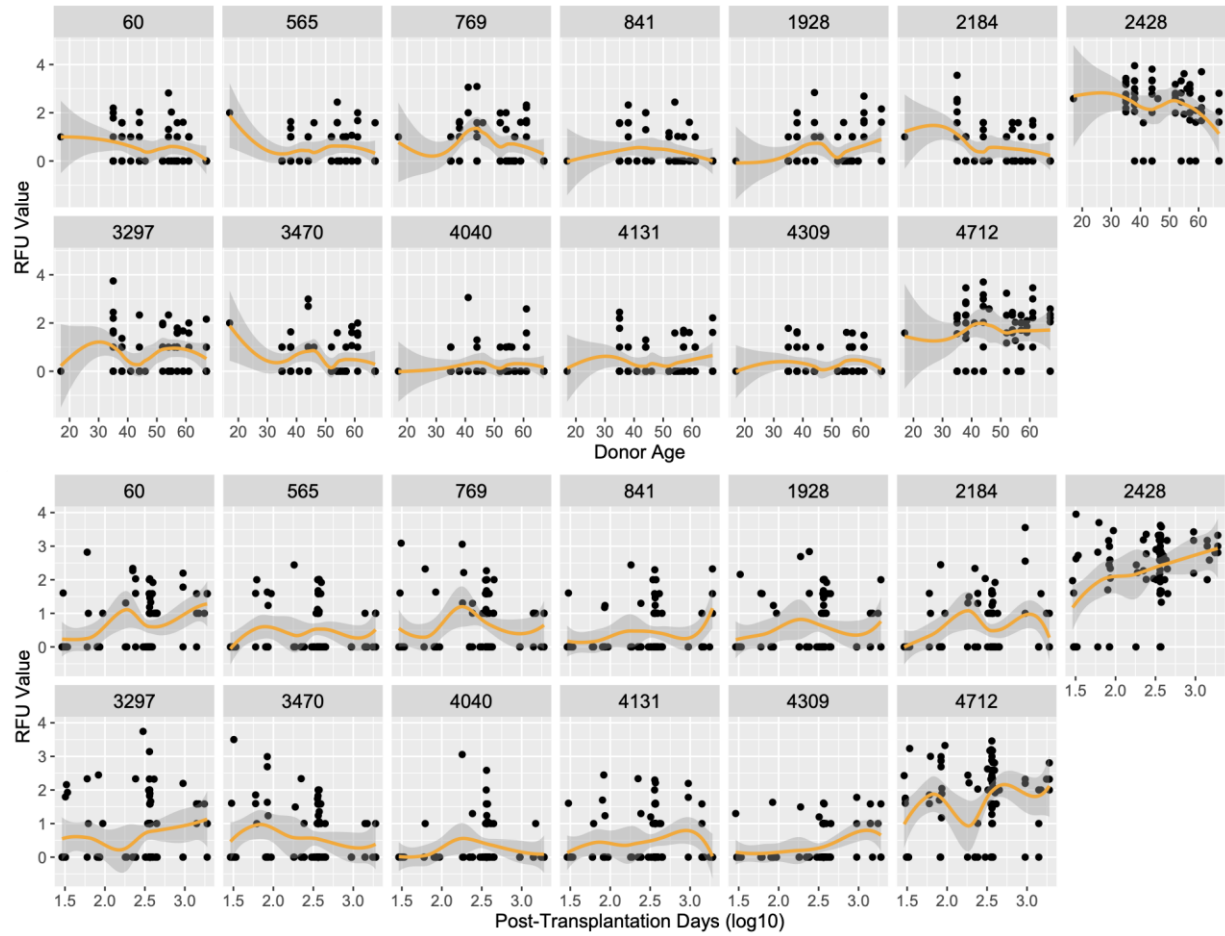

**Supplementary Fig. 6: eRFU dynamics with donor age (upper panel) or with post-transplantation days (lower panel). Source data are provided as a Source Data file.**

**Supplementary Table 1: Data sets used in this study.**

| Study                    | Sample Size*            | Disease                           | PubMed ID | Link                                                                                                                                          |
|--------------------------|-------------------------|-----------------------------------|-----------|-----------------------------------------------------------------------------------------------------------------------------------------------|
| Emerson et al., 2013     | 50                      | Healthy Donor, Multiple Sclerosis | 23428915  | <a href="https://clients.adaptivebiotech.com/pub/emerson-2013-jim">https://clients.adaptivebiotech.com/pub/emerson-2013-jim</a>               |
| Nolan et al., 2020       | 1,414                   | Healthy Donor (COVID-19)          | 32793896  | <a href="https://clients.adaptivebiotech.com/pub/covid-2020">https://clients.adaptivebiotech.com/pub/covid-2020</a>                           |
| Pagliuca et al., 2021    | 135                     | Leukemia (BM transplant)          | 34748628  | <a href="https://clients.adaptivebiotech.com/pub/pagliuca-2021-b">https://clients.adaptivebiotech.com/pub/pagliuca-2021-b</a>                 |
| Kanakry et al., 2016     | 104                     | Healthy Donor and GVHD patients   | 27213183  | <a href="https://clients.adaptivebiotech.com/pub/Kanakry-2016-JCIInsight">https://clients.adaptivebiotech.com/pub/Kanakry-2016-JCIInsight</a> |
| Emerson et al., 2017     | 666                     | Healthy Donors                    | 28369038  | <a href="https://clients.adaptivebiotech.com/pub/emerson-2017-natgen">https://clients.adaptivebiotech.com/pub/emerson-2017-natgen</a>         |
| Britanova et al., 2016   | 79                      | Healthy Donors                    | 27183615  | <a href="http://mitcr.milaboratory.com/datasets/">http://mitcr.milaboratory.com/datasets/</a>                                                 |
| Sacco et al., 2022       | 131                     | Pediatric MIS-C (COVID-19)        | 35177862  | <a href="https://clients.adaptivebiotech.com/pub/sacco-2021-misc">https://clients.adaptivebiotech.com/pub/sacco-2021-misc</a>                 |
| Towlerton et al., 2022   | 192                     | HIV patients                      | 35585986  | <a href="https://clients.adaptivebiotech.com/pub/towlerton-2022-hiv">https://clients.adaptivebiotech.com/pub/towlerton-2022-hiv</a>           |
| Gittelman et al., 2022   | 2,887                   | Healthy Donor (COVID-19)          | 35439174  | <a href="https://clients.adaptivebiotech.com/pub/gittelman-2022-jci">https://clients.adaptivebiotech.com/pub/gittelman-2022-jci</a>           |
| Greenberger et al., 2022 | 505                     | Leukemia (COVID-19)               | 36074641  | <a href="https://clients.adaptivebiotech.com/pub/greenberger-2022-bcd">https://clients.adaptivebiotech.com/pub/greenberger-2022-bcd</a>       |
| Cader et al., 2020       | 102                     | Hochkin lymphoma                  | 32778827  | <a href="https://clients.adaptivebiotech.com/pub/cader-2020-nm">https://clients.adaptivebiotech.com/pub/cader-2020-nm</a>                     |
| DeWolf et al., 2022      | 108                     | Post-mortem                       | 37494469  | <a href="https://clients.adaptivebiotech.com/pub/dewolf-2022-gvhd">https://clients.adaptivebiotech.com/pub/dewolf-2022-gvhd</a>               |
| Fischer et al., 2021     | 65                      | Twins with CF                     | 33708199  | <a href="https://clients.adaptivebiotech.com/pub/fischer-2021-fi">https://clients.adaptivebiotech.com/pub/fischer-2021-fi</a>                 |
| Mitchell et al., 2022    | 359                     | Healthy Donor (Pediatric)         | 35998036  | <a href="https://clients.adaptivebiotech.com/pub/mitchell-2022-jcii">https://clients.adaptivebiotech.com/pub/mitchell-2022-jcii</a>           |
| Dong et al., 2021        | 18 donors, 75,820 cells | Type 1 Diabetes                   | 34324441  | <a href="https://www.ncbi.nlm.nih.gov/geo/query/acc.cgi?acc=GSE178991">https://www.ncbi.nlm.nih.gov/geo/query/acc.cgi?acc=GSE178991</a>       |
| Garner et al., 2023      | 12 donors, 89,456 cells | Mixed conditions                  | 37580605  | <a href="https://www.ncbi.nlm.nih.gov/geo/query/acc.cgi?acc=GSE194189">https://www.ncbi.nlm.nih.gov/geo/query/acc.cgi?acc=GSE194189</a>       |

\*: Actual sample size of the original cohort might be larger. The number in this table reflect the sample size used in this study. Preprocessing and sample filtering criteria are described in Methods.
