# Supplementary material for: Quantifiable blood TCR repertoire components associate with immune aging
Source: PubMed Central journal article supplement — Nat Commun. 2024 Sep 17;15:8171. doi: 10.1038/s41467-024-52522-z (PMC11408526; doi:10.1038/s41467-024-52522-z), 2024-09-17
Supplement: 41467_2024_52522_MOESM3_ESM.pdf [file 41467_2024_52522_MOESM3_ESM.pdf]

## **Description of Additional supplementary file**

**Supplementary Data 1.** Age association of 5000 RFUs in the two adult cohorts. The 13 eRFUs are marked red.
